25 **Abstract**

26 The mechanistic bases of thermal acclimation of net photosynthetic rate ( $A_n$ ) are still  
27 difficult to discern and empirical research remains limited, particularly for hybrid poplar.  
28 In the present study, we examined the contribution of a number of biochemical and  
29 biophysical traits on thermal acclimation of  $A_n$  for two hybrid poplar clones. We grew  
30 cuttings of *Populus maximowiczii* × *Populus nigra* (M×N) and *Populus maximowiczii* ×  
31 *Populus balsamifera* (M×B) clones under two day/night temperature of 23°C/18°C and  
32 33°C /27°C and under low and high soil nitrogen level. After 10 weeks, we measured leaf  
33 RuBisCO and RuBisCO activase ( $RCA$ ) amounts and the temperature response of  $A_n$ , dark  
34 respiration ( $R_d$ ), stomatal conductance, ( $g_s$ ), maximum carboxylation rate of CO<sub>2</sub> ( $V_{cmax}$ )  
35 and photosynthetic electron transport rate ( $J$ ). Results showed that a 10°C increase in  
36 growth temperature resulted in a shift in thermal optimum ( $T_{opt}$ ) of  $A_n$  of 6.2±1.6 °C and  
37 8.0±1.2 °C for clone M×B and M×N respectively, and an increased  $A_n$  and  $g_s$  at the growth  
38 temperature for clone M×B but not M×N. RuBisCO amount was increased by N level but  
39 was insensitive to growth temperature while  $RCA$  amount and the ratio of its short to long  
40 isoform was stimulated by warm condition for clone M×N and at low N for clone M×B.  
41 The activation energy of  $V_{cmax}$  and  $J$  decreased under warm condition for clone M×B and  
42 remain unchanged for clone M×N. Our study demonstrated the involvement of both  $RCA$ ,  
43 activation energy of  $V_{cmax}$  and stomatal conductance in thermal acclimation of  $A_n$ .

## 45 **Introduction**

46 Global warming may lead to a significant reduction of forest productivity through a  
47 decrease in net assimilation rate of CO<sub>2</sub> (Lloyd and Farquhar, 2008; Sage et al., 2008).  
48 Plant physiological processes including light-saturated photosynthetic rate ( $A_n$ ) and dark  
49 respiration ( $R_d$ ) are strongly temperature-dependent and their acclimation may help trees  
50 maintain a normal growth when temperature shifts from optimum to warm (Atkin et al.,  
51 2005; Medlyn et al., 2002; Sage et al., 2008). Thermal acclimation of  $A_n$  is achieved  
52 through adjustments of one or more morphological, biochemical and biophysical  
53 components of photosynthesis which may occur via (i) a shift of the thermal optimum of  
54  $A_n$  ( $T_{opt}$ ) toward the new growth temperature (ii) an increase or a maintenance of the  
55 photosynthetic rate at  $T_{opt}$  ( $A_{opt}$ ) at warmer growth temperatures (iii) a shift in both  $A_{opt}$  and  
56  $T_{opt}$ , and (iv) an increase or a maintenance of the photosynthetic rate respective to growth  
57 temperature ( $A_{growth}$ ) (Sage and Kubien, 2007; Way and Yamori, 2014; Yamori et al.,  
58 2014). The mechanisms involved in thermal acclimation of photosynthesis are still difficult  
59 to discern and may originate, among others, from species thermal origin (Yamori et al.,  
60 2009). They include modulation of (i) basal maximum carboxylation rate  $V_{cmax}^{25}$  or  
61 maximum electron transport rate  $J_{max}^{25}$  (measured at reference temperature of 25°C), (ii)  
62 thermal response of both  $V_{cmax}$  and  $J_{max}$  (activation and deactivation energy), (iii) nitrogen  
63 allocation to carboxylation vs. electron transport (ratio of  $J_{max}$  to  $V_{cmax}$ ) and (iv) thermal  
64 response of stomatal and mesophyll conductance (Hikosaka et al., 2006; Sage and Kubien,  
65 2007; Way and Yamori, 2014; Yamori et al., 2014).

66 Leaf nitrogen (N) plays a key role in carbon assimilation processes and hence plant growth  
67 and survival (DesRochers et al., 2003; Fisichelli et al., 2015), as most of the leaf nitrogen  
68 is allocated to proteins involved in light harvesting, Calvin-Benson cycle and electron  
69 transfer along thylakoid membranes (Field, 1983; Poorter et al., 2009). Leaf nitrogen  
70 content is generally deficient in temperate and boreal regions and has been shown to  
71 decrease in response to increasing growth temperature (Reich and Oleksyn, 2004;  
72 Gunderson et al., 2010; Scafaro et al., 2016). A decrease in leaf N in response to increasing  
73 growth temperature may result in a decrease of RuBisCO content (Scafaro et al., 2016).  
74 This has been proposed as an explanation of the commonly observed decrease in  $V_{\text{cmax}}$  at  
75 temperatures above the optimum and the resulting lack of thermal acclimation of  $A_n$   
76 (Scafaro et al., 2016; Crous et al., 2018). On the other hand, Yamori et al., (2011) found  
77 that photosynthesis temperature response of several  $C_3$  plants was generally RuBP  
78 carboxylation-limited above the  $T_{\text{opt}}$  at low leaf nitrogen content while, under high N level,  
79 it shifted to a limitation by RuBP regeneration. However, the effect of temperature on the  
80 limiting steps of  $A_n$  ( $V_{\text{cmax}}$  vs.  $J_{\text{max}}$ ) may depend on the response of  $\text{CO}_2$  conductance ( $g_s$  and  
81  $g_m$ ) as well (Benomar et al., 2018; Qiu et al., 2017; von Caemmerer and Evans, 2015;  
82 Warren, 2008). Moreover, RuBisCO-related effect on  $A_n$  at above-optimal temperature  
83 may depend on the plasticity of  $J_{\text{max}}^{25}$  to  $V_{\text{cmax}}^{25}$  ratio. From this perspective, this may be  
84 applicable only for cold-adapted plant species, which are characterized by a higher  $J_{\text{max}}^{25}$   
85 to  $V_{\text{cmax}}^{25}$  ratio and low or lack of its adjustment in response to both N level and growth  
86 temperature (Benomar et al., 2018; Kattge and Knorr, 2007). Weston et al. (2007) did not  
87 observe any change in RuBisCO concentration for two genotypes of *Acer rubrum* grown  
88 under hot and optimal temperatures. Then, more research is needed to unravel the multiple

89 factors involved in the response of carbon assimilation to above-optimal temperatures. In  
90 fact, it has been proven that  $V_{\text{cmax}}$  do not only depend on RuBisCO concentration but also  
91 on its activation state (inhibited/activated) (Cen and Sage, 2005; Sage et al., 2008; Salvucci  
92 and Crafts-Brandner, 2004). The activation state of RuBisCO is regulated by the RuBisCO  
93 activase (*RCA*), a heat-labile enzyme using energy via ATP hydrolysis to release  
94 inhibitors from the active site of RuBisCO (Crafts-Brandner and Salvucci, 2000; Salvucci  
95 and Crafts-Brandner, 2004; Yamori and von Caemmerer, 2009). A decrease in *RCA*  
96 activity has been documented as a primary cause of reducing RuBisCO activity and then  
97 photosynthetic performance in response to increasing growth temperature (Hozain et al.,  
98 2009; Salvucci and Crafts-Brandner, 2004; Yamori and von Caemmerer, 2009). *RCA* is a  
99 stromal protein existing in two isoforms of 41–43 kDa (short isoform) and 45–46 kDa (long  
100 isoform) that arises from one single gene with alternatively spliced transcript or from two  
101 separate genes. Still, the specific physiological role of a given isoform with respect to heat  
102 stress is generally not understood. Recent studies from herbaceous species demonstrated  
103 an increase in the two *RCA* forms or a shift in the balance between them when plants were  
104 exposed to temperature above 30°C (Law et al., 2001; Ristic et al., 2009; Wang et al., 2010;  
105 Weston et al., 2007; Yamori et al., 2014).

106 Here we used *Populus* to study the physiological thermal acclimation because of its  
107 commercial and environmental importance in the northern hemisphere and its fast growth  
108 rate. Information on the response of photosynthesis to higher temperature for tree species  
109 is limited in general, and previous studies conducted on *Populus balsamifera* (Silim et al.,  
110 2010), *Populus tremuloides* (Dillaway and Kruger 2010), *Populus nigra* (Centritto et al.,  
111 2011), *Populus grandidentata* (Gunderson et al., 2010) and *Populus deltoides* × *nigra*. (Ow

112 et al., 2008) found little evidence of a thermal acclimation of  $A_n$  to increasing temperatures.  
113 Nevertheless, little research focused on the physiological and molecular mechanisms  
114 underlying the observed thermal acclimation of trees. The objective of the present study  
115 was to examine to what extent leaf nitrogen, RuBisCO and RCA content are involved in  
116 thermal acclimation of photosynthetic activity in hybrid poplars.

117

## 118 **Methodology**

### 119 **Plant material and growth conditions**

120 This experiment was conducted in greenhouses and growth chambers at Université Laval,  
121 Québec, Canada, from January to May 2017. Dormant cuttings of two hybrid poplar clones:  
122 M×N (*Populus maximowiczii* × *Populus nigra*) and M×B (*Populus maximowiczii* ×  
123 *Populus balsamifera*) were provided by the Québec's Ministère des Forêts, de la Faune et  
124 des Parcs from the forest nursery of Berthier (Berthierville, Québec, Canada) during early  
125 January after chilling needs were met. Cuttings were planted in 2 L pots filled with  
126 peat/vermiculite substrate (v/v=3/1) and placed in two greenhouses where day/night  
127 temperatures were 23°C/18°C and 33°C/27°C. Plants were grown under a  
128 photosynthetically active radiation (*PAR*) ranging between 400 and 700  $\mu\text{mol m}^{-2} \text{s}^{-1}$ , a  
129 relative humidity of 65% and a 8/16 h dark/light photoperiod using 400 W metal halide  
130 lamps. Cuttings were irrigated daily to maintain full soil field capacity. After 4 weeks, for  
131 a better control of growth conditions (mainly temperature and relative humidity), pots were  
132 transferred to growth chambers (model PGW 36, Conviron, Winnipeg, Canada) under a  
133 split-split-plot layout; the Temperature×Clone as first split and Nitrogen level as second

134 split. The same environment parameters as in greenhouses were used, except PAR, which  
135 was kept at a constant rate of  $500 \mu\text{mol m}^{-2} \text{s}^{-1}$  during day time. In each growth chamber,  
136 half of plants ( $n=18$ ) were randomly assigned to receive a low-nitrogen fertilization  
137 treatment (5 mM) while the other half received a high-nitrogen (20 mM). Nitrogen was  
138 added, every week, using (20N-20P-20K) fertilizer dissolved in distilled water. Plants ( $n =$   
139  $72$ ; 2 growth temperatures  $\times$  2 nitrogen levels  $\times$  2 hybrid poplar clones  $\times$  9 replicates) were  
140 allowed to acclimate to respective growth conditions for 6 weeks before measurements  
141 were taken. Pots were moved within each chamber every third day to eliminate any  
142 position-related bias.

143

#### 144 **Gas exchange measurements**

145 After 10 weeks of growth, leaf-level gas exchange were measured on the 4<sup>th</sup> fully expanded  
146 leaf from the top of each plant using two cross-calibrated portable open-path gas-exchange  
147 systems (Li-6400, Li-Cor Inc., Lincoln NE), equipped with a leaf chamber fluorometer (Li-  
148 6400-40, Li-Cor Inc). The measurements were made on 24 plants in total (3 replicates  $\times$  2  
149 clones  $\times$  2 temperatures  $\times$  2 N levels). Given the limited control capacity of LI-6400 system  
150 on leaf temperature in the cuvette ( $T_{leaf}$  can be set to  $\pm 6^\circ\text{C}$  of the ambient temperature),  
151 measurements were performed in a growth chamber under controlled temperature and  
152 relative humidity. Growth chamber temperature was set manually to desired  $T_{leaf}$  allowing  
153 an effective and quick easy adjustment over the 10 - 40°C range and an exposure of the  
154 whole plant to the targeted temperature.

155 Temperature was increased from 10°C to 40°C with 5°C increment and plants were allowed  
156 to acclimate for at least 20 min to each step. At each temperature, we measured dark  
157 respiration ( $R_d$ ) followed by  $A-C_i$  response curve records with 10-minutes period between  
158  $R_d$  and  $A-C_i$  respected to allow complete opening of stomata.  $A-C_i$  response curves were  
159 recorded at each temperature after at least 10 min of steady state at ambient CO<sub>2</sub> partial  
160 pressure  $C_a=400 \mu\text{mol mol}^{-1}$  and a saturated photosynthetic active radiation  $PAR=800$   
161  $\mu\text{mol m}^{-2} \text{s}^{-1}$ . The saturated  $PAR$  was determined from measured  $A-Q$  curve on 3 plants  
162 from each Clone×Growth T° combination at 25°C. Thereafter, the reference CO<sub>2</sub> ( $C_a$ ) was  
163 changed in the following order: 400, 350, 300, 200, 100, 50, 400, 500, 600, 800, 900, 1000,  
164 1200, 1400, and 1600  $\mu\text{mol mol}^{-1}$ . Values were recorded based on the stability of  
165 photosynthesis, stomatal conductance ( $g_s$ ), CO<sub>2</sub> and water vapor concentration. The vapor  
166 pressure difference ( $VPD$ ) during measurement varied from 0.5 to 3.2 KPa from low to  
167 high temperature and was lowered as much as possible at high temperature by maintaining  
168 relative humidity ( $RH$ ) at 70% inside the growth chamber. Similarly,  $RH$  was maintained  
169 at 50% to maintain  $VPD$  as high as 0.5 KPa at low temperature. The list of abbreviations  
170 and symbols are given in Table 1.

171

172



173 Table 1: List of abbreviations

174

| Symbol                         | Definition                                                                                    | Unit                                               |
|--------------------------------|-----------------------------------------------------------------------------------------------|----------------------------------------------------|
| $A_c$                          | RuBP-saturated CO <sub>2</sub> assimilation rate                                              | $\mu\text{mol CO}_2 \text{ m}^{-2} \text{ s}^{-1}$ |
| $A_{growth}$                   | Photosynthetic rate at growth temperature                                                     | $\mu\text{mol CO}_2 \text{ m}^{-2} \text{ s}^{-1}$ |
| $A_n$                          | Net CO <sub>2</sub> assimilation rate                                                         | $\mu\text{mol CO}_2 \text{ m}^{-2} \text{ s}^{-1}$ |
| $A_j$                          | RuBP-limited CO <sub>2</sub> assimilation rate                                                | $\mu\text{mol CO}_2 \text{ m}^{-2} \text{ s}^{-1}$ |
| $A_{opt}$                      | Photosynthetic rate at $T_{opt}$                                                              | $\mu\text{mol CO}_2 \text{ m}^{-2} \text{ s}^{-1}$ |
| $C_a$                          | Atmospheric CO <sub>2</sub> concentration                                                     | $\mu\text{mol mol}^{-1}$                           |
| $C_i$                          | intercellular CO <sub>2</sub> concentration                                                   | $\mu\text{mol mol}^{-1}$                           |
| $E_a$                          | Energy of deactivation                                                                        | $\text{KJ mol}^{-1}$                               |
| $E_d$                          | Activation energy                                                                             | $\text{KJ mol}^{-1}$                               |
| $g_s$                          | Stomatal conductance                                                                          | $\text{mol H}_2\text{O m}^{-2} \text{ s}^{-1}$     |
| $J$                            | Electron transport rate                                                                       | $\mu\text{mol m}^{-2} \text{ s}^{-1}$              |
| $J_{max}^{25}$                 | Maximal electron transport rate at leaf temperature of 25°C                                   | $\mu\text{mol m}^{-2} \text{ s}^{-1}$              |
| $J_{max}^{25} : V_{cmax}^{25}$ | Ratio of maximal electron transport to maximal carboxylation rate at leaf temperature of 25°C |                                                    |
| $N_{area}$                     | Leaf nitrogen in area basis                                                                   | $\text{g m}^{-2}$                                  |
| $O$                            | Partial atmospheric pressure of O <sub>2</sub>                                                | $\text{mmol mol}^{-1}$                             |
| $PAR$                          | Photosynthetically active radiation                                                           | $\mu\text{mol m}^{-2} \text{ s}^{-1}$              |
| $SLA$                          | Specific leaf area                                                                            | $\text{cm}^2 \text{ g}^{-1}$                       |
| $R_{day}$                      | Mitochondrial respiration in the light                                                        | $\mu\text{mol CO}_2 \text{ m}^{-2} \text{ s}^{-1}$ |
| $R_d$                          | Dark respiration                                                                              | $\mu\text{mol CO}_2 \text{ m}^{-2} \text{ s}^{-1}$ |
| $R_d^{10}$                     | $R_d$ at leaf temperature of 10°C                                                             | $\mu\text{mol CO}_2 \text{ m}^{-2} \text{ s}^{-1}$ |
| $RCA$                          | RuBisCO activase                                                                              |                                                    |
| $T_{opt}$                      | Thermal optimum                                                                               | °C                                                 |
| $K_c$                          | Michaelis–Menten constants of Rubisco for CO <sub>2</sub>                                     | $\mu\text{mol mol}^{-1}$                           |
| $K_o$                          | Michaelis–Menten constants of Rubisco for O <sub>2</sub>                                      | $\text{mmol mol}^{-1}$                             |
| $Q_{10}$                       | Rate of change in $R_d$ with a 10°C increase in temperature                                   |                                                    |
| $\Gamma^*$                     | CO <sub>2</sub> compensation point in the absence of mitochondrial respiration                | $\mu\text{mol mol}^{-1}$                           |
| $\alpha$                       | Efficiency of light energy conversion                                                         |                                                    |
| $V_{cmax}$                     | Maximal carboxylation rate                                                                    | $\mu\text{mol CO}_2 \text{ m}^{-2} \text{ s}^{-1}$ |
| $V_{cmax}^{25}$                | Maximal carboxylation rate at leaf temperature of 25°C                                        | $\mu\text{mol CO}_2 \text{ m}^{-2} \text{ s}^{-1}$ |

175

176

## 177 Estimation of gas exchange parameters

178 The photosynthetic capacity variables,  $V_{cmax}$  and  $J_{max}$ , were estimated from gas-exchange  
179 by fitting the  $A-C_i$  curve with the biochemical model of  $C_3$  (Farquhar et al., 1980), assuming  
180 infinite mesophyll conductance ( $g_m$ ). In fact, the estimation of  $g_m$  from  $A-C_i$  is very  
181 challenging as it depends on the number of data points on the  $A-C_i$  curve and goodness -  
182 of-fit of the curve which is difficult to achieve at high and low temperatures. In this  
183 experiment, we tried to estimate  $g_m$  from  $A-C_i$  curves following Ethier et al. (2004) and  
184 Miao et al. (2008) without success as about 45 % of them gave non-meaningful estimates.  
185 The model was thus fitted using non-linear regression techniques (Proc NLIN, SAS)  
186 following Dubois et al. (2007). Briefly, the net assimilation rate ( $A_n$ ) is given as:

$$187 \quad A_n = \min \{A_c, A_j\} \quad (1)$$

$$188 \quad A_c = V_{cmax} \frac{(C_i - \Gamma^*)}{C_i + K_c \left(1 + \frac{O}{K_o}\right)} - R_{day} \quad (2)$$

$$189 \quad A_j = J \frac{C_i - \Gamma^*}{4(C_i + 2\Gamma^*)} - R_{day} \quad (3)$$

$$190 \quad J = \frac{\alpha Q}{\sqrt{1 + \left(\frac{\alpha Q}{J_{max}}\right)^2}} \quad (4)$$

191

192 where  $V_{cmax}$  is the apparent maximum rate of carboxylation ( $\mu\text{mol CO}_2 \text{ m}^{-2} \text{ s}^{-1}$ ),  $O$  is the  
193 partial atmospheric pressure of  $\text{O}_2$  ( $\text{mmol mol}^{-1}$ ),  $\Gamma^*$  is the  $\text{CO}_2$  photo-compensation point  
194 in the absence of mitochondrial respiration,  $R_{day}$ , is mitochondrial respiration in the light  
195 ( $\mu\text{mol CO}_2 \text{ m}^{-2} \text{ s}^{-1}$ ),  $C_i$  is the intercellular (substomatal) concentration of  $\text{CO}_2$  ( $\mu\text{mol mol}^{-1}$ ),  
196  $K_c$  ( $\mu\text{mol mol}^{-1}$ ) and  $K_o$  ( $\text{mmol mol}^{-1}$ ) are the Michaelis–Menten constants of Rubisco  
197 for  $\text{CO}_2$  and  $\text{O}_2$ , respectively,  $J$  is the apparent rate of electron transport ( $\mu\text{mol CO}_2 \text{ m}^{-2} \text{ s}^{-1}$ )

198 <sup>1</sup>),  $J_{\max}$  is the apparent maximum rate of electron transport ( $\mu\text{mol CO}_2 \text{ m}^{-2} \text{ s}^{-1}$ ),  $Q$  is the  
199 incident  $PAR$  ( $\mu\text{mol m}^{-2} \text{ s}^{-1}$ ),  $\alpha$  is the efficiency of light energy conversion (0.18) which  
200 represents the initial slope of the photosynthetic light response curve (Miao et al., 2008).  
201 The values at 25°C used for  $K_c$ ,  $K_o$  and  $\Gamma^*$  were 272  $\mu\text{mol mol}^{-1}$ , 166  $\text{mmol mol}^{-1}$  and 37.4  
202  $\mu\text{mol mol}^{-1}$ , respectively (Sharkey et al., 2007) and their temperature dependency were as  
203 in Sharkey et al.(2007. Most of  $A-C_i$  curves at 35°C and 40 °C measured for low nitrogen  
204 level at 23 °C failed to converge and estimates of  $V_{cmax}$  and  $J$  could not be obtained.

### 205 **Characterization of the temperature responses of gas exchange parameters**

206 Photosynthesis temperature response curves were fitted individually with a quadratic  
207 model following Battaglia et al. (1996):

$$208 \quad A_n(T) = A_{opt} - b(T - T_{opt})^2 \quad (5)$$

209 where  $A_n(T)$  is the photosynthetic rate at temperature  $T$  in °C,  $A_{opt}$  is the photosynthetic rate  
210 at the temperature optimum ( $T_{opt}$ ) and the parameter  $b$  describes the spread of the parabola.

211  $A_{growth}$  was then estimated using the obtained parameters from equation (5) for each  
212 individual curve. Daytime temperature was used as growth temperature given the  
213 uncertainty regarding the effect of nighttime temperature on  $A_n$ .

214

215 Dark respiration temperature response curves were fitted with a model in equation (6) to  
216 estimate the  $Q_{10}$  (the change in respiration with a 10°C increase in temperature) following  
217 Atkin et al. (2005):

$$218 \quad R_d(T) = R_d^{10} Q_{10}^{[(T - 10)/10]} \quad (6)$$

219 where  $R_d^{10}$  is the measured basal rate of  $R_d$  at the reference temperature of 10°C.

220

221 The responses of  $V_{cmax}$  and  $J$  to leaf temperature were fitted using the following two models  
222 (equation (7) and (8)) depending on the presence or not of deactivation above thermal  
223 optimum following Medlyn et al. (2002):

$$224 \quad f(T_k) = e^{\left(c - \frac{E_a}{RT}\right)} \quad (7)$$

$$225 \quad f(T_k) = k_{opt} \frac{E_d \exp\left[\frac{E_a(T_k - T_{opt})}{T_k RT_{opt}}\right]}{E_d - E_a \left[1 - \exp\left(\frac{E_d(T_k - T_{opt})}{T_k RT_{opt}}\right)\right]} \quad (8)$$

226 where  $E_a$  is the activation energy,  $E_d$  is the energy of deactivation,  $K_{opt}$  is the  $V_{cmax}$  or  $J$  at  
227 the temperature optimum ( $T_{opt}$ ).  $E_d$  was fixed at 200 KJ mol<sup>-1</sup> (Medlyn et al., 2002) to  
228 reduce the number of estimated parameters to three.

229

### 230 **SLA and leaf nitrogen**

231 Leaves used for gas exchange measurements were collected and immediately placed in dry  
232 ice before being stored at -20°C and processed within a week for protein extraction. The  
233 extracts were conserved under -80°C and dosage of proteins (RuBisCO and RCA) was  
234 done once all samples were extracted. Symmetric leaves (by the stem) were also collected  
235 to measure projected area with WinSeedle (Version 2007 Pro, Regent Instruments, Québec,  
236 Canada). Samples were then oven-dried for 72h at 56 °C, and their dry mass determined.  
237 Specific leaf area (*SLA*) was calculated as the ratio of the projected leaf area (cm<sup>2</sup>) to the  
238 leaf dry mass (g). Later, leaves were ground separately and N content determined at

239 Université Laval using a LECO elemental analyser (LECO Corporation, St Joseph, MI,  
240 USA).

#### 241 **Extraction and dosage of RuBisCO and RuBisCO activase**

242 Proteins were extracted from frozen leaves at -20 °C within less than one week after leaf  
243 harvesting following the method outlined in Yamori and von Caemmerer (2009). Briefly,  
244 100 mg of leaves were initially ground in liquid nitrogen using a mortar and pestle. Proteins  
245 were extracted on ice using a protein extraction buffer containing 50 mM Hepes-KOH pH  
246 7.8, 10 mM MgCl<sub>2</sub>, 1 mM EDTA, 5 mM DTT, 0.1% triton X100 (v/v) and protease  
247 inhibitor cocktail (Roche). The extracts were conserved under -80°C. Once all samples  
248 were extracted, the solutions were centrifuged at 16,000g for 1 min followed by  
249 determination of the concentration of total soluble proteins (TSP) in supernatant by the  
250 Bradford method (Bradford, 1976).

251 After dosage, 4× sample buffer (250 mM Tris-HCl, pH 6.8, 40% glycerol, 8% SDS, 0.2%  
252 Bromophenol-blue, 200 mM DTT) was added to proteins extracts, heated at 100 °C for 5  
253 min and then centrifuged at 16,000 g for 5 min. After cooling to room temperature, a  
254 volume representing 20 µg of total TSP extract of each sample was loaded onto 12% SDS-  
255 polyacrylamide gel electrophoresis (SDS-PAGE). The electrophoresis was carried out at  
256 room temperature at a constant voltage (120 V). Following SDS-Page, the proteins were  
257 transferred to a nitrocellulose membrane (Life Sciences, Mississauga, Canada) for western  
258 blot.

259 Blots were incubated with 5% non-fat milk in TBST (50 mM Tris, pH 7.5, 150 mM NaCl,  
260 0.1% Tween-20) for 60 min, the membranes were washed twice with TBST and incubated  
261 with antibodies against RuBisCO (Agriser AB, Vännäs, Sweden) or against RuBisCO

262 activase (Agrisera AB, Vännäs, Sweden) at room temperature for 60 min. Membranes were  
263 washed three times with TBST for 10 min and incubated with secondary antibodies  
264 peroxidase-conjugated (Goat Anti-Chicken (abcam) for RuBisCO and Goat Anti-Rabbit  
265 (abcam) for RuBisCO activase) during 60 min at room temperature. Blots were washed  
266 with TBST three times and developed with the ECL system using Odyssey® Infrared  
267 Imaging System (Li-COR, Biosciences). Images were analysed using ImageJ (Rasband,  
268 2016) to determine band densities of each sample. The RuBisCo, *RCA* and its two isoforms  
269 concentration were expressed as relative to the sample representing the highest density  
270 (Perdomo et al., 2017; Prins et al., 2008; Ristic et al., 2009).

271

## 272 **Statistical analysis**

273 Three-way analysis of variance was performed to test the effect of growth temperature,  
274 clone and nitrogen level on response variables using MIXED procedure of SAS (SAS  
275 Institute, software version 9.4, Cary, NC, USA). We used proc Glimmix for response  
276 variables (apparent  $V_{\text{cmax}}^{25}$ , apparent  $J_{\text{max}}^{25}$  and  $E_d$ ) which did not met the assumptions of  
277 residual normality and homoscedasticity even with transformations. Means were compared  
278 by the adjusted Tukey method and differences were considered significant if  $P \leq 0.05$ .

279

## 280 **Results**

### 281 **Temperature response of $A_n$ and $R_d$**

282 The temperature response curve of net photosynthesis at saturated light ( $A_n$ ) followed a  
283 common parabolic shape (Fig. 1a, 1b). The two hybrid poplar clones adjusted their thermal

284 optimum ( $T_{opt}$ ) of  $A_n$  in response to growth temperature. Low nitrogen level constrained the  
285 adjustment of  $T_{opt}$  for clone M×N but not M×B (Table 2). Also,  $T_{opt}$  was lower than growth  
286 temperature except for clone M×B at 23°C. The two hybrid poplar clones showed different  
287 trends regarding  $A_n$  at  $T_{opt}$  ( $A_{opt}$ ) which increased with increasing growth temperature for  
288 clone M×B and remained unaffected for clone M×N.  $A_{growth}$  had a similar trend as  $A_{opt}$  in  
289 response to growth temperature and N level. Both  $A_{growth}$  and  $A_{opt}$  declined at low N level  
290 for both clones (Table 2).

291 The two hybrid poplar clones had different strategies in term of thermal response of dark  
292 respiration ( $R_d$ ) (Fig. 1c, 1d). Irrespective of N level, basal rate of  $R_d$  ( $R_d^{/0}$ ) decreased by  
293 augmenting growth temperature for clone M×B but remained unchanged for clone M×N  
294 (Table 2). The rate of change in  $R_d$  by 10°C change in temperature,  $Q_{10}$ , decreased when  
295 growth temperature was increased, irrespective of N level for clone M×N. In contrast,  $Q_{10}$   
296 of clone M×B increased in response to growth temperature raise when N level was high  
297 and unchanged at low N level (Table 2).

298

299 **Fig 1.** Response of net photosynthesis ( $A_n$ ) and dark respiration ( $R_d$ ) to leaf temperature for  
300 hybrid poplar clone M×B (a, c) and clone M×N (b, d) grown under two temperatures and  
301 two nitrogen levels.

302 H23 and L23 are treatments of high and low nitrogen level respectively at an ambient day  
303 temperature of 23°C; H33 and L33 are treatments of high and low nitrogen level at 33°C  
304 ambient day temperature. Data are represented by means  $\pm$  SE (n=3).  $P$  value and  $R^2$  of  
305 curves are given in Table S1.

306





308 Table 2: Means ( $\pm$ SE) of thermal acclimation-related traits of two hybrid poplar clones (M×B and M×N) grown at day/night  
 309 temperature of 23/18°C and 33/27°C under high (HN) and low (LN) nitrogen levels (n=3).

|                                | Clone M×B                |                          |                         |                          | Clone M×N               |                           |                          |                         |
|--------------------------------|--------------------------|--------------------------|-------------------------|--------------------------|-------------------------|---------------------------|--------------------------|-------------------------|
|                                | 23°C                     |                          | 33°C                    |                          | 23°C                    |                           | 33°C                     |                         |
|                                | HN                       | LN                       | HN                      | LN                       | HN                      | LN                        | HN                       | LN                      |
| $T_{opt}(A_n)$                 | 23.1 (1.2) <sup>bc</sup> | 24.1 (1.2) <sup>b</sup>  | 30.3 (1.3) <sup>a</sup> | 29.3 (1.3) <sup>a</sup>  | 20.5 (1.2) <sup>c</sup> | 19.7 (1.3) <sup>c</sup>   | 30.1 (1.3) <sup>a</sup>  | 26.1 (1.3) <sup>b</sup> |
| $A_{opt}$                      | 10.1 (0.8) <sup>b</sup>  | 7.1(0.8) <sup>d</sup>    | 14.9 (0.8) <sup>a</sup> | 9.3 (0.8) <sup>cb</sup>  | 15.1 (0.8) <sup>a</sup> | 9.1 (0.8) <sup>c</sup>    | 14.2 (0.8) <sup>a</sup>  | 10.9 (0.8) <sup>b</sup> |
| $A_{growth}$                   | 10.6(1.0) <sup>b</sup>   | 6.9(0.9) <sup>c</sup>    | 13.9(1.1) <sup>a</sup>  | 8.9(1.1) <sup>c</sup>    | 14.9(1.1) <sup>a</sup>  | 9.6(0.9) <sup>c</sup>     | 13.4(1.1) <sup>a</sup>   | 9.5(1.1) <sup>c</sup>   |
| $Rd_{10}$                      | 0.76(0.1) <sup>b</sup>   | 0.80(0.1) <sup>ab</sup>  | 0.60(0.1) <sup>cd</sup> | 0.70(0.1) <sup>c</sup>   | 0.90(0.1) <sup>a</sup>  | 0.56(0.1) <sup>d</sup>    | 0.90(0.1) <sup>a</sup>   | 0.71(0.2) <sup>cd</sup> |
| $Q_{10}(Rd)$                   | 1.9(0.1) <sup>b</sup>    | 1.8(0.1) <sup>b</sup>    | 2.0(0.1) <sup>a</sup>   | 1.9(0.1) <sup>b</sup>    | 2.0(0.1) <sup>a</sup>   | 2.2(0.1) <sup>a</sup>     | 1.8(0.1) <sup>b</sup>    | 1.8(0.1) <sup>b</sup>   |
| $g_s_{growth}$                 | 0.16(0.01) <sup>c</sup>  | 0.17(0.01) <sup>bc</sup> | 0.26(0.01) <sup>a</sup> | 0.20(0.01) <sup>b</sup>  | 0.20(0.01) <sup>b</sup> | 0.16(0.01) <sup>c</sup>   | 0.18(0.01) <sup>cb</sup> | 0.13(0.01) <sup>d</sup> |
| $V_{cmax}^{25}$                | 53(6) <sup>c</sup>       | 34(6) <sup>d</sup>       | 70(6) <sup>ab</sup>     | 38(6) <sup>d</sup>       | 78(6) <sup>a</sup>      | 54(6) <sup>bc</sup>       | 62(7) <sup>b</sup>       | 53(6) <sup>bc</sup>     |
| $J_{max}^{25}$                 | 146(7) <sup>b</sup>      | 67(7) <sup>d</sup>       | 106(6) <sup>c</sup>     | 74(9) <sup>d</sup>       | 240(9) <sup>a</sup>     | 124(7) <sup>c</sup>       | 162(8) <sup>b</sup>      | 107(8) <sup>c</sup>     |
| $T_{opt}(V_{cmax})$            | 33(1.5)                  | -                        | NA                      | NA                       | 34(1.2)                 | -                         | NA                       | NA                      |
| $E_a(V_{cmax})$                | 75 (3) <sup>a</sup>      | -                        | 49(3) <sup>b</sup>      | 57(3) <sup>b</sup>       | 58(3) <sup>b</sup>      | -                         | 54(3) <sup>b</sup>       | 55(3) <sup>b</sup>      |
| $T_{opt}(J)$                   | 34 (1.9)                 | -                        | NA                      | NA                       | 30(1.1)                 | -                         | NA                       | NA                      |
| $E_a(J)$                       | 46(2) <sup>a</sup>       | -                        | 32(2) <sup>b</sup>      | 28(2) <sup>b</sup>       | 34(2) <sup>ab</sup>     | -                         | 28(2) <sup>b</sup>       | 33(2) <sup>b</sup>      |
| $J_{max}^{25} : V_{cmax}^{25}$ | 2.43(0.1) <sup>ab</sup>  | 1.68(0.15) <sup>c</sup>  | 1.53(0.15) <sup>c</sup> | 1.81(0.19) <sup>bc</sup> | 2.68(0.15) <sup>a</sup> | 2.01 (0.15) <sup>bc</sup> | 2.42(0.19) <sup>ab</sup> | 1.95(0.16) <sup>b</sup> |
| $SLA$                          | 172(7) <sup>a</sup>      | 132(7) <sup>cd</sup>     | 154(8) <sup>b</sup>     | 123(7) <sup>d</sup>      | 143(7) <sup>b</sup>     | 141(7) <sup>bc</sup>      | 136(8) <sup>c</sup>      | 112(8) <sup>e</sup>     |
| $N_{area}$                     | 1.3(0.1) <sup>b</sup>    | 0.8(0.1) <sup>d</sup>    | 1.3(0.1) <sup>b</sup>   | 0.8(0.1) <sup>d</sup>    | 1.9(0.1) <sup>a</sup>   | 1.1(0.1) <sup>c</sup>     | 1.4(0.1) <sup>b</sup>    | 1.1(0.1) <sup>c</sup>   |

310 Within rows, means followed by the same letter do not differ significantly at  $\alpha=0.05$  based on Tukey's test

311 **Temperature response of apparent  $V_{\text{cmax}}$  and  $J$**

312 Apparent  $V_{\text{cmax}}^{25}$  was insensitive to growth temperature at low N level for both clones. In  
313 contrast, at high N level, apparent  $V_{\text{cmax}}^{25}$  increased for clone M×B and decreased for clone  
314 M×N when growth temperature was increased (Table 2). Apparent  $J_{\text{max}}^{25}$  decreased with  
315 increasing growth temperature for plants growing at high N level and was insensitive to  
316 growth temperature at low N level. The ratio  $J_{\text{max}}^{25}:V_{\text{cmax}}^{25}$  decreased with increasing  
317 growth temperature at high N level for clone M×B but not for clone M×N (Table 2). At  
318 low N level,  $J_{\text{max}}^{25}:V_{\text{cmax}}^{25}$  ratio was insensitive to growth temperature.

319 The temperature response curve of apparent  $V_{\text{cmax}}$  and apparent  $J$  were affected by growth  
320 temperature but not by nitrogen level. In fact, at cooler growth temperature, apparent  $V_{\text{cmax}}$   
321 peaked at 33°C and 34°C (Fig. 2; Table 2) and apparent  $J$  peaked at 34°C and 30°C (Fig.  
322 2; Table 2) for clones M×B and M×N respectively. However, apparent  $V_{\text{cmax}}$  and apparent  
323  $J$  did not show any deactivation at warm temperature (Fig. 2). The activation energy ( $E_a$ )  
324 of apparent  $V_{\text{cmax}}$  and  $J$ , decreased with increasing growth temperature for clone M×B and  
325 remained constant for clone M×N (Table 2).

326 **Fig 2.** The temperature dependence of the apparent maximum carboxylation capacity of  
327 RuBisCO ( $V_{\text{cmax}}$ ) and the apparent electron transport rate ( $J$ ) for clone M×B (a, c) and clone  
328 M×N (b, d) grown under two temperatures and two nitrogen levels.

329 See Fig 1 for symbols. L23 treatment was not given for both clones because A-Ci curves  
330 at 35 and 40 °C failed to converge and estimates of  $V_{\text{cmax}}$  and  $J$  could not be obtained. Data  
331 are represented by means  $\pm$  SE (n=3).  $P$  value and  $R^2$  of curves are given in Table S1

332

333

334

### 335 **Temperature response of stomatal conductance ( $g_s$ )**

336  $g_s$  decreased under all treatments and for both clones when  $T_{leaf}$  was increased over the 10-  
337 40°C gradient (Fig. 3).  $g_s$  at the growth temperature, derived from the  $g_s$ - $T$  response curves  
338 ( $g_{s\_growth}$ ) was influenced by both clone and growth temperature. For clone M×B,  $g_{s\_growth}$   
339 was 62.5 % and 17 % higher at warm, compared to cooler growth temperature under high  
340 and low nitrogen level respectively (Table 2). Conversely, for clone M×N,  $g_{s\_growth}$  was  
341 similar among growth temperature at high N level averaging 0.19 mol H<sub>2</sub>O m<sup>-2</sup> s<sup>-1</sup> and  
342 decreased by increasing growth temperature at low N level (0.16 vs. 0.13 mol H<sub>2</sub>O m<sup>-2</sup>  
343 s<sup>-1</sup>).

344

345 **Fig 3.** Response of stomatal conductance ( $g_s$ ) to leaf temperature of two hybrid poplar  
346 clones (M×B) and (M×N) grown under two temperatures and two nitrogen levels (n=3).

347 See Figure 1 for symbols. Data are represented by means ± SE (n=3).  $P$  value and  $R^2$  of  
348 curves are given in Table S1

349

350

### 351 **RuBisCO and RuBisCO activase amount**

352 Relative amount of RuBisCO ( $RAR$ ) decreased significantly when N level changed from  
353 high to low (Fig. 4a).  $RAR$  did not change in response to change of growth temperature for  
354 both clones (Fig. 4a). In addition, at high N level,  $RAR$  was similar between clones, being  
355 around 0.8 on average. At low N level,  $RAR$  was two folds higher for clone M×N compared

356 to clone M×B (Fig. 4a). Nitrogen enrichment remarkably increased the relative amount of  
357 RuBisCO activase (*RARCA*), particularly for clone M×N which had a lower *RARCA* at low  
358 N level, compared to M×B (Fig. 4b). Except for clone M×B at high N, *RARCA* was  
359 stimulated by warmer growth temperature (Fig. 4b). More importantly, the ratio of short  
360 isoform to large isoform of *RCA* was markedly simulated by warm conditions for clone  
361 M×N and only at low N for clone M×B (Fig. 5).

362

363 **Figure 4:** Relative amounts of RuBisCO (a) and RuBisCO-activase (b) measured by  
364 western blot for two hybrid poplar clones (M×B) and (M×N) grown under two  
365 temperatures and two nitrogen levels (n=3).

366 Proteins were extracted from leaves and analysed by SDS-PAGE. Immunoblots were  
367 probed with anti-Rubisco or anti-RCA antibody. H23 and L23 are treatments of high and  
368 low nitrogen level respectively at 23°C ambient daytime temperature; H33 and L33 are  
369 treatments of low and high nitrogen level at 33°C ambient daytime temperature. Data are  
370 represented by means ± SD (n=3). Means having the same letters are not significantly  
371 different at  $\alpha=0.05$  based on Tukey's tests.

372

373 **Figure 5:** Ratio of short to long isoform of RuBisCO-activase (*RCA*) of two hybrid poplar  
374 grown under two temperatures and two nitrogen levels (n=3).

375 *RCA-S*: short isoform of *RCA*; *RCA-L*: long isoform of *RCA*. Data are represented by  
376 means ± SE (n=3). Means having the same letters are not significantly different at  $\alpha=0.05$   
377 based on Tukey's tests.

378

379

380 **DISCUSSION**

381 **Thermal acclimation of  $A_n$  and  $R_d$**

382 The two hybrid poplar clones showed a clear thermal acclimation of  $A_n$  by adjusting  $A_{opt}$   
383 and/or  $T_{opt}$  to growth temperature. This is in accordance with results of Silim et al. (2010)  
384 on cold and warm ecotypes of *Populus balsamifera* which maintained  $A_{opt}$  without an  
385 evident change of  $T_{opt}$ . We found that  $T_{opt}$  of  $A_n$  under warm temperature was identical to  
386 mean growth temperature (the average of day time/night-time =30°C) and was 3°C below  
387 the daytime growth temperature (33°C) suggesting a partial acclimation of photosynthesis  
388 rate if we assume the latter was unrelated to night-time temperature. So far, studies focusing  
389 on night-time temperature effect on  $A_n$  are very scarce (Turnbull et al., 2002).  $T_{opt}$  of  $A_n$  for  
390 clone M×N was lowered by low nitrogen level under warm conditions. This result is  
391 difficult to explain from traits measured in our study and could be an outcome of a  
392 differential expression of proteins. The net photosynthetic rates at the growth temperature  
393 ( $A_{growth}$ ), a relevant quantitative trait of thermal acclimation of  $A_n$  (Way and Yamori, 2014;  
394 Yamori et al., 2014), was enhanced in plants grown at the warm temperature for clone M×B  
395 and remained unchanged for clone M×N. These results suggest a differential thermal  
396 adaptation range of the two hybrid poplar clones which could result from the climate of  
397 origin of their parents. Hence, the choice of suitable clones based on their thermal  
398 acclimation capacity would increase productivity of hybrid poplar plantations under future  
399 warming conditions, particularly in heat-prone regions like the south of Québec, Canada.

400

401 Thermal acclimation of  $R_d$  is very common for  $C_3$  plants and several studies reported a  
402 downshift of  $R_d^{10}$  (Type II acclimation) and a decrease of  $Q_{10}$  (Type I acclimation) in

403 reponse to warmer temperatures (Atkin and Tjoelker, 2003; Reich et al., 2016) but few  
404 studies on *Populus* exist in this regard (Dillaway and Kruger, 2011; Ow et al., 2008; Silim  
405 et al., 2010; Tjoelker et al., 1999). In accordance with the finding of Tjoelker et al. (1999)  
406 for *Populus tremula*, we found substantial Type I acclimation of  $R_d$  (downshift of  $Q_{10}$ ) to  
407 growth temperature for clone M×N. In contrast, no acclimation of  $R_d$  was observed for  
408 clone M×B which may be related to the unchanged density of mitochondria (Atkin and  
409 Tjoelker, 2003). Moreover, nitrogen had no effect on thermal acclimation of  $Q_{10}$  for both  
410 clones as observed in other tree species (Benomar et al., 2018; Tjoelker et al., 1999).

411

#### 412 **Thermal response of photosynthetic biochemical limitations**

413 The effect of growth temperature on temperature response curve of apparent  $V_{\text{cmax}}$  and  $J$  in  
414 terms of their values at reference temperature of 25°C, their  $T_{\text{opt}}$  and their activation energy  
415 is species-dependant as reported by recent studies (Benomar et al., 2018; Hikosaka et al.,  
416 2006; Hikosaka et al., 1999; Kattge and Knorr, 2007; Slot and Winter 2017; Way and  
417 Yamori 2014). In our study, the apparent  $V_{\text{cmax}}^{25}$  stimulated by warm growth temperature  
418 for clone M×B, might explain the noticeable increase of  $A_{\text{opt}}$  (up to 50 %) by warmer  
419 growth conditions under high N level. In parallel, the small decrease in the apparent  $V_{\text{cmax}}^{25}$   
420 at warm growth conditions observed for clone M×N might explain the observed similar  
421  $A_{\text{opt}}$  under the two growth temperature. These results are in agreement with the findings of  
422 other studies showing a similar or a greater  $V_{\text{cmax}}^{25}$  when growth temperature increased  
423 (Aspinwall et al., 2017; Silim et al., 2010; Way and Yamori, 2014; Slot and Winter, 2017).  
424 In contrast, the apparent  $J_{\text{max}}^{25}$  decreased at warmer growth temperature as reported for

425 *Populus balsamifera* (Silim et al., 2010) and other tree species (Yamori et al., 2008; Way  
426 and Yamori, 2014; Slot and Winter, 2017).

427 Hikosaka et al. (2006) suggested the increase in the activation energy of  $V_{cmax}$  ( $E_a$ ) with the  
428 increase in growth temperature as an explanatory mechanism of thermal acclimation of  $A_n$   
429 (at least by the increase of  $T_{opt}$  with growth temperature). Our results are diverging with  
430 this postulate since we observed no change in  $E_a$  for clone M×N and a remarkable decrease  
431 of  $E_a$  for clone M×B. However, the patterns we observed have been reported for several  
432 species including *Populus tremuloides* (Dillaway and Kruger, 2010), *Populus balsamifera*  
433 (Silim et al., 2010) and *Corymbia calophylla* (Aspinwall et al., 2017).

434 The temperature optimum ( $T_{opt}$ ) of apparent  $V_{cmax}$  and  $J$  acclimated to growth temperature  
435 (Fig. 2) as observed for others species (Kattge and Knorr, 2007; Crous et al., 2018) and  
436 may have contributed in the observed acclimation of  $A_n$  (Fig. 1). Under cooler conditions,  
437  $T_{opt}$  of apparent  $V_{cmax}$  and  $J$  were similar but much higher than that of  $A_n$  indicating a very  
438 likely involvement of other traits in the observed value of  $T_{opt}$  of  $A_n$  under this condition  
439 (23 °C).

440

441 The adjustment of leaf nitrogen invested in soluble vs. insoluble proteins in response to  
442 change in growth temperature, inferred from  $J_{max}^{25}$  to  $V_{cmax}^{25}$  ratio, can be achieved through  
443 the maintenance of an optimal balance between the rate of photosynthetic carboxylation  
444 vs. RuBP regeneration. This mechanism allows plants to maximize the photosynthetic rate  
445 at a given growth temperature (Hikosaka et al., 1999; Kattge and Knorr, 2007). Therefore,  
446 the decrease of  $J_{max}^{25}:V_{cmax}^{25}$  ratio consequent to an increase of growth temperature has  
447 been reported to significantly contribute to thermal acclimation of  $A_n$  (Kattge and Knorr,

448 2007; Slot and Winter 2017; Crous et al., 2018). In our study, this pattern occurred for  
449 clone M×B under high N level which has resulted in an increase of both  $V_{cmax}^{25}$  and  $A_{opt}$ .  
450 Conversely, the lack of modulation of  $J_{max}^{25}:V_{cmax}^{25}$  ratio for clone M×N may have  
451 contributed to the observed decrease in  $V_{cmax}^{25}$  and to the maintenance of  $A_{opt}$ . Under low  
452 N level,  $A_{opt}$  of M×B increased under warmer conditions without any change of the  
453  $J_{max}^{25}:V_{cmax}^{25}$  ratio . Therefore, the increase of  $V_{cmax}^{25}$  and  $A_{opt}$  under the warm growth  
454 temperature cannot be attributed only to the shift in  $J_{max}^{25}:V_{cmax}^{25}$  ratio.

455

#### 456 **RuBisCO and RuBisCO activase amounts in response to experimental warming**

457 The RuBisCO content in our study was quite sensitive to nitrogen level but not to growth  
458 temperature . Neither thermal acclimation of  $A_n$  ( $T_{opt}$  and  $A_{opt}$ ) nor  $J_{max}^{25}:V_{cmax}^{25}$  ratio was  
459 affected by RuBisCO content. The absence of any effect of RubisCO content on traits  
460 related to thermal acclimation of  $A_n$  has been reported by Weston et al. (2007) and Kruse  
461 et al. (2017), while other studies found a significant decrease of  $V_{cmax}^{25}$  linked to a decrease  
462 in RuBisCO and leaf nitrogen content (Scafaro et al., 2016; Crous et al., 2018). Thus, the  
463 relationship between the change in RuBisCO content in response to growth temperature  
464 and thermal acclimation of  $A_n$  via the modulation of photosynthetic capacity attributes  
465 ( $V_{cmax}^{25}$  and  $J_{max}^{25}$ ) is, most likely, depending on species and environmental parameters  
466 (e.g. nitrogen availability). Indeed, CO<sub>2</sub> conductance, the variation of *RCA* content and the  
467 temperature dependency of Rubisco kinetic properties have been reported to be  
468 determinant factors of the  $V_{cmax}^{25}$  response to growth temperature and consequently thermal  
469 acclimation of  $A_n$  (Perdomoetal et al., 2017; Way and Yamori, 2014; Yamori et al., 2006;  
470 Qiu et al., 2017). The increase of leaf *RCA* amount by increased growth temperature has



471 been reported for several tree species (Crafts-Brandner and Salvucci, 2000; Hozain et al.,  
472 2009; Law et al., 2001; Ristic et al., 2009; Weston et al., 2007; Yamori and von Caemmerer,  
473 2009). In our study, the hypothesized increase of *RCA* at warmer growth temperature was  
474 observed, except for clone M×B at high N. More importantly, our results demonstrated that  
475 the increase of the amount of *RCA* under warm conditions resulted mainly from increased  
476 synthesis of the short isoform which indicates that the two isoforms operate at different  
477 temperature optima.

478

### 479 **Stomatal conductance**

480 The contribution of diffusional limitations to thermal acclimation of  $A_n$  remain non-well  
481 quantified for several species, including *Populus*. Our results demonstrate that the  
482 modulation of  $g_s$  (the shape of the relationship between  $g_s$  and  $T_{leaf}$  and the value of  $g_s$  at  
483 growth temperature) in response to change in growth temperature contributed to the  
484 observed thermal acclimation of  $A_n$  (Figure 3) as observed by Aspinwall et al. (2017), Silim  
485 et al. (2010) and Slot and Winter (2017). Also, our results suggest that the stomatal  
486 acclimation to growth temperature may be clone-specific and may have a significant impact  
487 on clone response to warming depending on soil water status. The  $CO_2$  diffusion in the  
488 mesophyll shares the same pathways of water transport from mesophyll to the atmosphere  
489 (Ethier et al., 2004; Flexas et al., 2013) and may lead to similar response of stomatal and  
490 mesophyll conductance to growth conditions. Moreover, a link between mesophyll  
491 conductance ( $g_m$ ) and hydraulic conductance has been reported as well (Flexas et al., 2013;  
492 Th eroux-Rancourt et al., 2014), suggesting that the observed response of  $g_s$  to growth  
493 temperature may have originated from a modulation of  $g_m$  and hydraulic functioning.

494 In conclusion, the observed thermal acclimation of photosynthesis under our experimental  
495 conditions was clearly related to the modulation of photosynthetic capacity and  $g_s$  in  
496 response to growth temperature. The modulation of the photosynthetic capacity was mainly  
497 linked to *RCA* but not RuBisCO content. Further investigation regarding the involvement  
498 of mesophyll conductance and hydraulic conductivity should clarify the mechanistic basis  
499 of the observed trends.

## 500 **Acknowledgements**

501 We thank Dr. G Ethier for his valuable comments on A-Ci curve analysis. We also thank  
502 F Larochelle and M Coyea (Université Laval) for their technical assistance throughout the  
503 project.

## 504 **References**

- 505 Aspinwall MJ, Vårhammar A, Blackman CJ, Tjoelker MG, Ahrens C, Byrne M, Tissue DT  
506 and Rymer PD (2017) Adaptation and acclimation both influence photosynthetic  
507 and respiratory temperature responses in *Corymbia calophylla*. *Tree Physiol*  
508 37:1095-1112.
- 509 Atkin OK, Bruhn D and Tjoelker MG (2005) Response of plant respiration to changes in  
510 temperature: Mechanisms and consequences of variations in  $Q_{10}$  values and  
511 acclimation In: Lambers H, Ribas-Carbo M. eds. *Plant respiration: from cell to*  
512 *ecosystem*. Dordrecht: Springer Netherlands.
- 513 Atkin OK and Tjoelker MG (2003) Thermal acclimation and the dynamic response of plant  
514 respiration to temperature. *Trends in Plant Science* 8:343-351.
- 515 Battaglia M, Beadle C and Loughhead S (1996) Photosynthetic temperature responses of  
516 *Eucalyptus globulus* and *Eucalyptus nitens*. *Tree Physiol* 16:81-89.
- 517 Benomar L, Lamhamedi MS, Pepin S, Rainville A, Lambert M-C, Margolis HA, Bousquet  
518 J and Beaulieu J (2018) Thermal acclimation of photosynthesis and respiration of  
519 southern and northern white spruce seed sources tested along a regional climatic  
520 gradient indicates limited potential to cope with temperature warming. *Ann Bot.* in  
521 press.
- 522 Bradford MM (1976) A rapid and sensitive method for the quantitation of microgram  
523 quantities of protein utilizing the principle of protein-dye binding. *Anal Biochem*  
524 72:248-254.
- 525 Cen Y-P and Sage RF (2005) The regulation of rubisco activity in response to variation in  
526 temperature and atmospheric CO<sub>2</sub> partial pressure in sweet potato. *Plant Physiol*  
527 139:979-990.

- 528 Centritto M, Brillì F, Fodale R and Loreto F (2011) Different sensitivity of isoprene  
529 emission, respiration and photosynthesis to high growth temperature coupled with  
530 drought stress in black poplar (*Populus nigra*) saplings. *Tree Physiol* 31:275-286.
- 531 Crafts-Brandner SJ and Salvucci ME (2000) Rubisco activase constrains the  
532 photosynthetic potential of leaves at high temperature and CO<sub>2</sub>. *Proc Natl Acad Sci*  
533 *USA* 97:13430-13435.
- 534 DesRochers A, Van Den Driessche R and Thomas BR (2003) Nitrogen fertilization of  
535 trembling aspen seedlings grown on soils of different pH. *Can J For Res* 33:552-  
536 560.
- 537 Dillaway DN and Kruger EL (2010) Thermal acclimation of photosynthesis: a comparison  
538 of boreal and temperate tree species along a latitudinal transect. *Plant Cell Enviro*  
539 33:888-899.
- 540 Dillaway DN and Kruger EL (2011) Leaf respiratory acclimation to climate: comparisons  
541 among boreal and temperate tree species along a latitudinal transect. *Tree Physiol*  
542 31:1114-1127.
- 543 Dubois JB, Fiscus EL, Booker F L, Flowers MD, and Reid CD (2007) Optimizing the  
544 statistical estimation of the parameters of the Farquhar–von Caemmerer–Berry  
545 model of photosynthesis. *New Phytol*, 176: 402-414.
- 546 Ethier GJ and Livingston NJ (2004) On the need to incorporate sensitivity to CO<sub>2</sub> transfer  
547 conductance into the Farquhar–von Caemmerer–Berry leaf photosynthesis model.  
548 *Plant Cell Enviro* 27:137-153.
- 549 Farquhar GD, von Caemmerer S and Berry JA (1980) A biochemical model of  
550 photosynthetic CO<sub>2</sub> assimilation in leaves of C<sub>3</sub> species. *Planta*. 149:78-90.
- 551 Field C (1983) Allocating leaf nitrogen for the maximization of carbon gain: Leaf age as a  
552 control on the allocation program. *Oecol* 56:341-347.
- 553 Fisichelli NA, Stefanski A, Frelich LE and Reich PB (2015) Temperature and leaf nitrogen  
554 affect performance of plant species at range overlap. *Ecosphere*. 6:1-4.
- 555 Flexas J, Scoffoni C, Gago J and Sack L (2013) Leaf mesophyll conductance and leaf  
556 hydraulic conductance: an introduction to their measurement and coordination. *J*  
557 *Exp Bot* 64:3965-3981.
- 558 Gunderson CA, O'Hara KH, Champion CM, Walker AV, Edwards NT (2010) Thermal  
559 plasticity of photosynthesis: the role of acclimation in forest responses to a warming  
560 climate. *Glob Chang Biol* 16: 2272–2286.
- 561 Hikosaka K, Ishikawa K, Borjigidai A, Muller O and Onoda Y (2006) Temperature  
562 acclimation of photosynthesis: mechanisms involved in the changes in temperature  
563 dependence of photosynthetic rate. *J Exp Bot* 57:291-302.
- 564 Hikosaka K, Murakami A and Hirose T (1999) Balancing carboxylation and regeneration  
565 of ribulose-1,5-bisphosphate in leaf photosynthesis: temperature acclimation of an  
566 evergreen tree, *Quercus myrsinaefolia*. *Plant Cell Enviro* 22:841-849.
- 567 Hozain MdI, Salvucci ME, Fokar M and Holaday AS (2009) The differential response of  
568 photosynthesis to high temperature for a boreal and temperate *Populus* species  
569 relates to differences in Rubisco activation and Rubisco activase properties. *Tree*  
570 *Physiol* 30:32-44.
- 571 Kattge J and Knorr W (2007) Temperature acclimation in a biochemical model of  
572 photosynthesis: a reanalysis of data from 36 species. *Plant Cell Environ* 30:1176-  
573 1190.

- 574 Kruse J, Adams MA, Kadinov G, Arab L, Kreuzwieser J, Alfarraj S, Schulze W and  
575 Rennenberg H (2017) Characterization of photosynthetic acclimation in *Phoenix*  
576 *dactylifera* by a modified Arrhenius equation originally developed for leaf  
577 respiration. *Trees* **31**:623-644.
- 578 Law DR, Crafts-Brandner SJ and Salvucci ME (2001) Heat stress induces the synthesis of  
579 a new form of ribulose-1,5-bisphosphate carboxylase/oxygenase activase in cotton  
580 leaves. *Planta* **214**:117-125.
- 581 Lloyd J, Farquhar GD (2008) Effects of rising temperatures and CO<sub>2</sub> on the physiology of  
582 tropical forest trees. *Philosophical Transactions of the Royal Society B: Biol*  
583 *Sci* **363**:1811-1817.
- 584 Medlyn BE, Dreyer E, Ellsworth D, Forstreuter M, Harley PC, Kirschbaum MUF, Le Roux  
585 X, Montpied P, Strassmeyer J, Walcroft A, Wang K and Loustau D (2002)  
586 Temperature response of parameters of a biochemically based model of  
587 photosynthesis. II. A review of experimental data. *Plant Cell Environ* **25**:1167-  
588 1179.
- 589 Miao Z, Xu M Lathrop RG and Wang Y (008) Comparison of the A–Cc curve fitting  
590 methods in determining maximum ribulose 1·5-bisphosphate  
591 carboxylase/oxygenase carboxylation rate, potential light saturated electron  
592 transport rate and leaf dark respiration. *Plant Cell Environ* **32**:109-122
- 593 Ow LF, Griffin KL, Whitehead D, Walcroft AS and Turnbull MH (2008) Thermal  
594 acclimation of leaf respiration but not photosynthesis in *Populus deltoides* x *nigra*.  
595 *New Phytol* **178**:123-134.
- 596 Perdomo JA, Capó-Bauçà S, Carmo-Silva E and Galmés J (2017) Rubisco and Rubisco  
597 Activase Play an Important Role in the Biochemical Limitations of Photosynthesis  
598 in Rice, Wheat, and Maize under High Temperature and Water Deficit. *Frontiers in*  
599 *Plant Science* **8**.
- 600 Prins A, van Heerden PDR, Olmos E, Kunert KJ and Foyer CH (2008) Cysteine proteinases  
601 regulate chloroplast protein content and composition in tobacco leaves: a model for  
602 dynamic interactions with ribulose-1,5-bisphosphate carboxylase/oxygenase  
603 (Rubisco) vesicular bodies. *J Exp Bot* **59**:1935-1950.
- 604 Poorter H, Niinemets Ü, Poorter L, Wright IJ and Villar R (2009) Causes and consequences  
605 of variation in leaf mass per area (LMA): a meta-analysis. *New Phytol* **182**:565-  
606 588.
- 607 Qiu C, Ethier G, Pepin S, Dubé P, Desjardins Y and Gosselin A (2017) Persistent negative  
608 temperature response of mesophyll conductance in red raspberry (*Rubus idaeus* L.)  
609 leaves under both high and low vapour pressure deficits: a role for abscisic acid?  
610 *Plant Cell Environ* **40**:1940-1959.
- 611 Rasband WS (2016) ImageJ, U. S. National Institutes of Health, Bethesda, Maryland, USA.
- 612 Reich PB and Oleksyn J (2004) Global patterns of plant leaf N and P in relation to  
613 temperature and latitude. *Proc. Natl. Acad. Sci USA* **101**:11001-11006.
- 614 Reich PB, Sendall KM, Stefanski A, Wei XR, Rich RL and Montgomery RA (2016) Boreal  
615 and temperate trees show strong acclimation of respiration to warming. *Nature*  
616 **531**:633-636.
- 617 Ristic Z, Momčilović I, Bukovnik U, Prasad PVV, Fu J, DeRidder BP, Elthon TE and  
618 Mladenov N (2009) Rubisco activase and wheat productivity under heat-stress  
619 conditions. *J Exp Bot* **60**:4003-4014.

- 620 Sage RF and Kubien DS (2007) The temperature response of C3 and C4 photosynthesis.  
621 *Plant Cell Environ* **30**:1086-1106.
- 622 Sage RF, Way DA and Kubien DS (2008) Rubisco, Rubisco activase, and global climate  
623 change. *J Exp Bot* **59**:1581-1595.
- 624 Salvucci ME and Crafts-Brandner SJ (2004) Relationship between the Heat Tolerance of  
625 Photosynthesis and the Thermal Stability of Rubisco Activase in Plants from  
626 Contrasting Thermal Environments. *Plant Physiol* **134**:1460-1470.
- 627 Scafaro AP, Xiang S, Long BM, Bahar NHA, Weerasinghe LK, Creek D, Evans JR, Reich  
628 PB and Atkin OK (2016) Strong thermal acclimation of photosynthesis in tropical  
629 and temperate wet-forest tree species: the importance of altered Rubisco content.  
630 *Glob Chang Biol* **23**:2783-2800.
- 631 Sharkey TD, Bernacchi CJ, Farquhar GD and Singaas EL (2007) Fitting photosynthetic  
632 carbon dioxide response curves for C3 leaves. *Plant Cell Environ* **30**:1035-1040.
- 633 Silim S, Ryan N and Kubien D (2010) Temperature responses of photosynthesis and  
634 respiration in *Populus balsamifera* L.: acclimation versus adaptation. *Photosynth*  
635 *Res* **104**:19-30.
- 636 Slot M and Winter K (2017) Photosynthetic acclimation to warming in tropical forest tree  
637 seedlings. *J Exp Bot* **68**:2275-2284.
- 638 Th eroux-Rancourt G,  thier G and Pepin S (2014) Threshold response of mesophyll CO<sub>2</sub>  
639 conductance to leaf hydraulics in highly transpiring hybrid poplar clones exposed  
640 to soil drying. *J Exp Bot* **65**:741-753.
- 641 Tjoelker MG, Reich PB and Oleksyn J (1999) Changes in leaf nitrogen and carbohydrates  
642 underlie temperature and CO<sub>2</sub> acclimation of dark respiration in five boreal tree  
643 species. *Plant Cell Environ* **22**:767-778.
- 644 Turnbull MH, Murthy R and Griffin KL (2002) The relative impacts of daytime and night-  
645 time warming on photosynthetic capacity in *Populus deltoides*. *Plant Cell Environ*  
646 **25**:1729-1737.
- 647 von Caemmerer S and Evans JR (2015) Temperature responses of mesophyll conductance  
648 differ greatly between species. *Plant Cell Environ* **38**:629-637.
- 649 Wang D, Li X-F, Zhou Z-J, Feng X-P, Yang W-J and Jiang D-A (2010) Two Rubisco  
650 activase isoforms may play different roles in photosynthetic heat acclimation in the  
651 rice plant. *Physiol Plant* **139**:55-67.
- 652 Warren CR (2008) Does growth temperature affect the temperature responses of  
653 photosynthesis and internal conductance to CO<sub>2</sub>? A test with *Eucalyptus regnans*.  
654 *Tree Physiol* **28**:11-19.
- 655 Way DA and Yamori W (2014) Thermal acclimation of photosynthesis: on the importance  
656 of adjusting our definitions and accounting for thermal acclimation of respiration.  
657 *Photosynth Res* **119**:89-100.
- 658 Weston DJ, Bauerle WL, Swire-Clark GA, Moore Bd and Baird WV (2007)  
659 Characterization of Rubisco activase from thermally contrasting genotypes of *Acer*  
660 *rubrum* (Aceraceae). *Am J Bot* **94**:926-934.
- 661 Yamori W, Hikosaka K and Way DA (2014) Temperature response of photosynthesis in  
662 C3, C4, and CAM plants: temperature acclimation and temperature adaptation.  
663 *Photosynth Res* **119**:101-117.

- 664 Yamori W, Nagai T and Makino A (2011) The rate-limiting step for CO<sub>2</sub> assimilation at  
665 different temperatures is influenced by the leaf nitrogen content in several C3 crop  
666 species. *Plant Cell Environ* **34**:764-777.
- 667 Yamori W, Noguchi K, Hikosaka K and Terashima I (2009) Cold-tolerant crop species  
668 have greater temperature homeostasis of leaf respiration and photosynthesis than  
669 cold-sensitive species. *Plant Cell Physiol* **50**:203-215.
- 670 Yamori W, Noguchi K, Kashino Y and Terashima I (2008) The role of electron transport  
671 in determining the temperature dependence of the photosynthetic rate in spinach  
672 leaves grown at contrasting temperatures. *Plant Cell Physiol* **49**:583-591.
- 673 Yamori W and von Caemmerer S (2009) Effect of rubisco activase deficiency on the  
674 temperature response of CO<sub>2</sub> assimilation rate and rubisco activation state: Insights  
675 from transgenic tobacco with reduced amounts of rubisco activase. *Plant Physiol*  
676 **151**:2073-2082.
- 677 Yamori W, Suzuki K, Noguchi K, Nakai M and Terashima I (2006) Effects of rubisco  
678 kinetics and rubisco activation state on the temperature dependence of the  
679 photosynthetic rate in spinach leaves from contrasting growth temperatures. *Plant*  
680 *Cell Physiol* **29**:1659-1670.
- 681

MxB

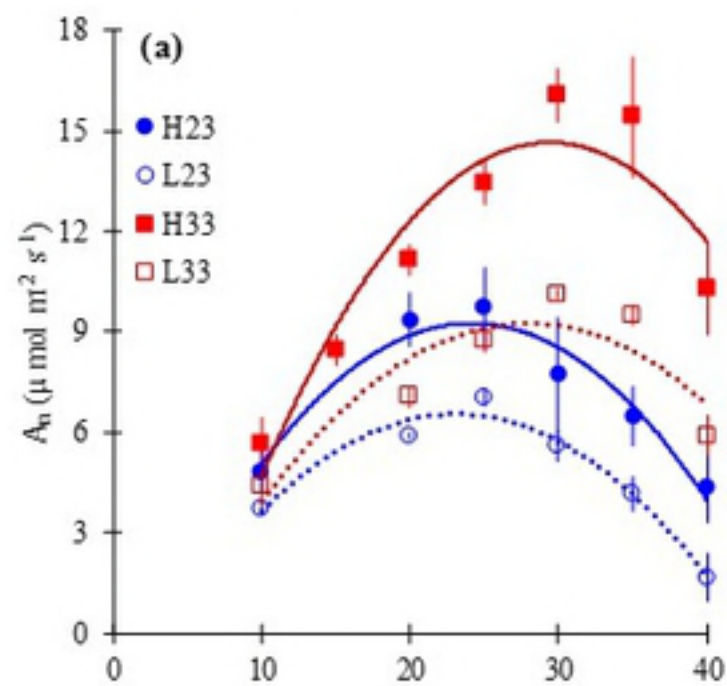

MxN

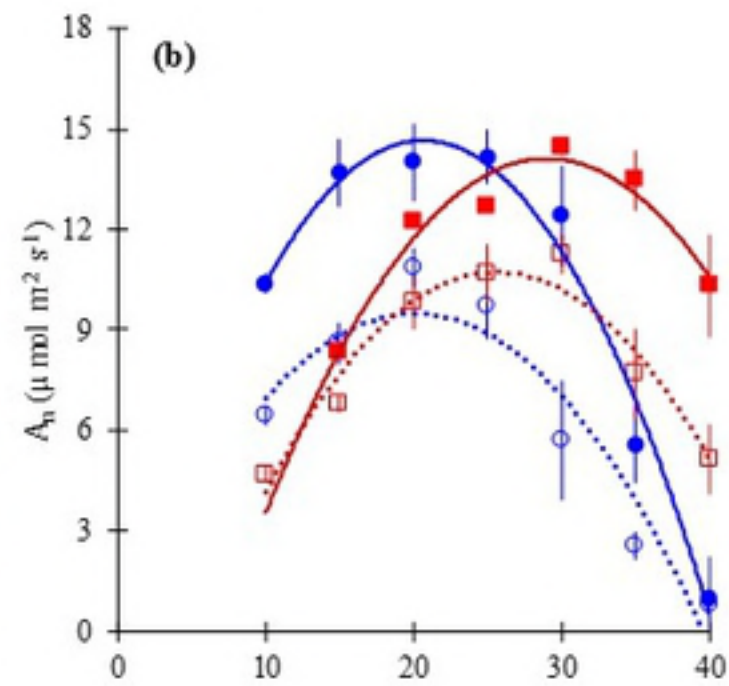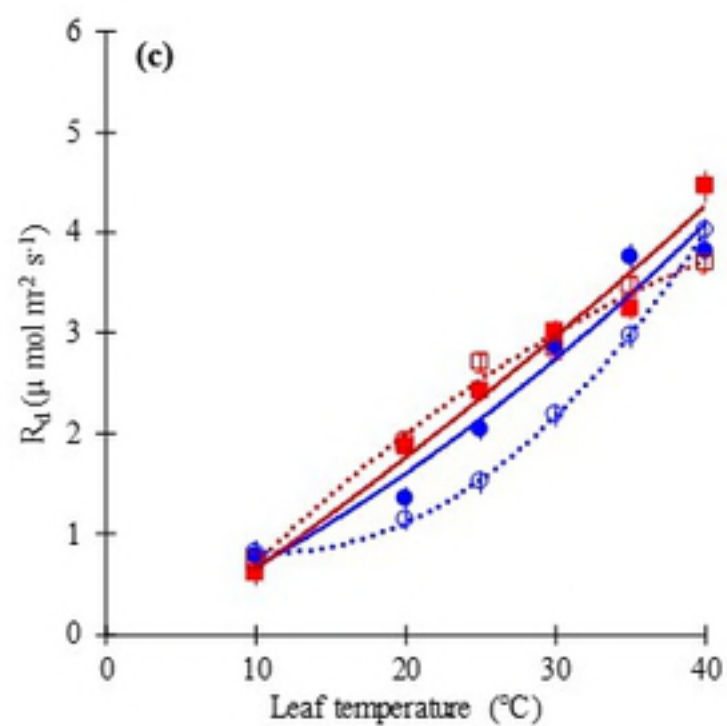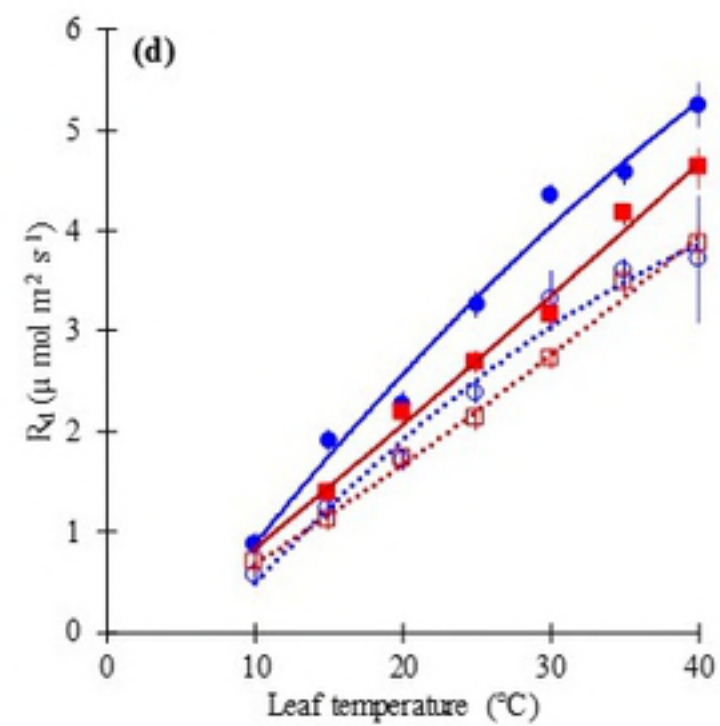

MxB

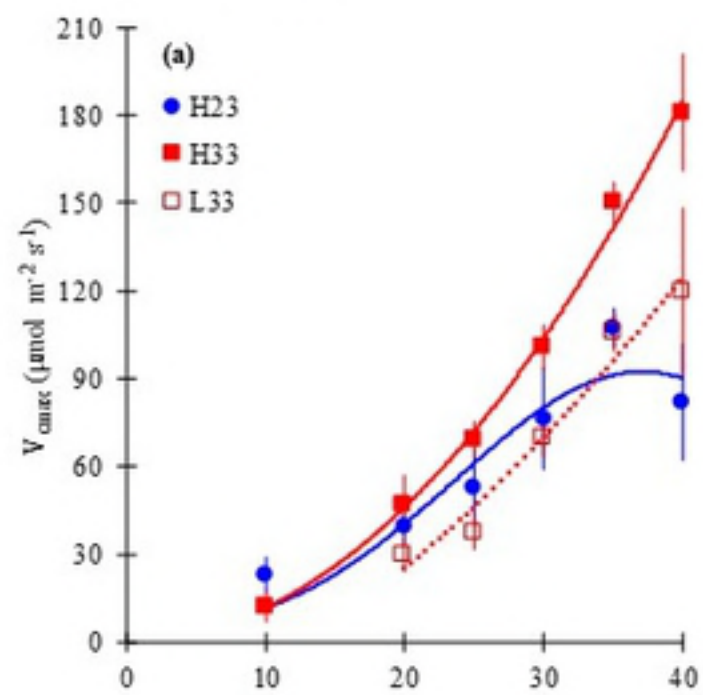

MxN

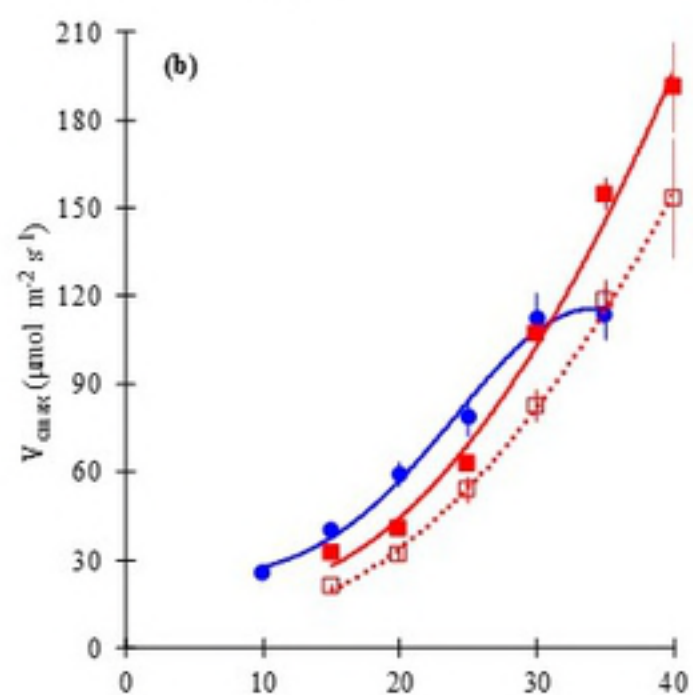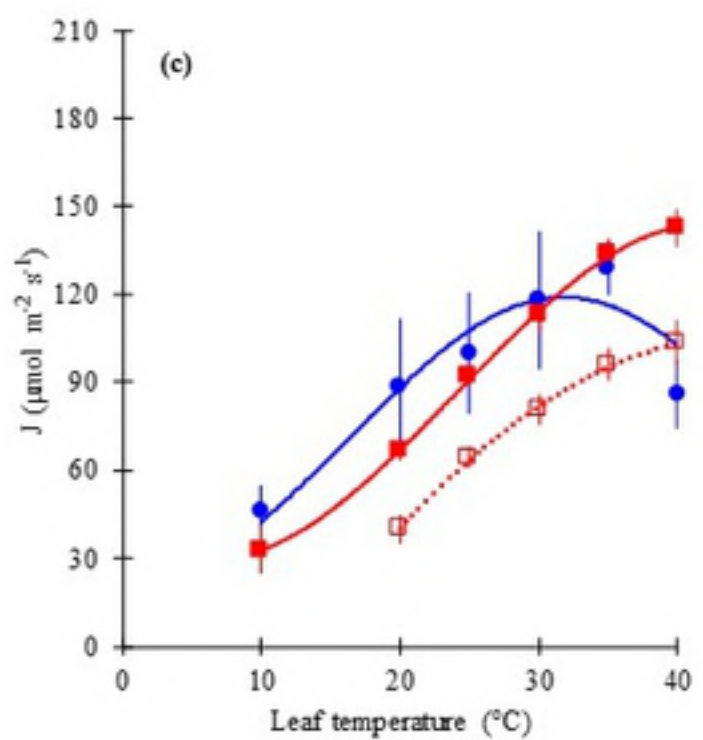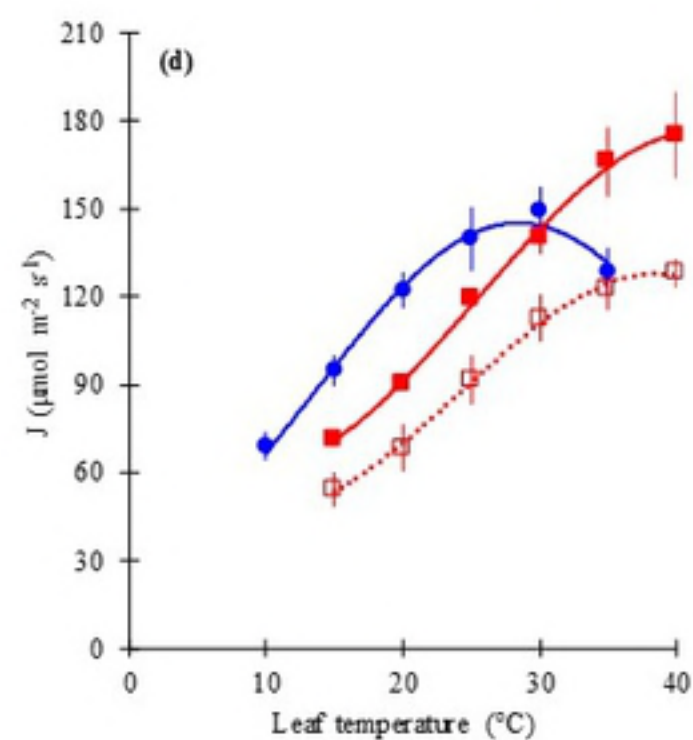



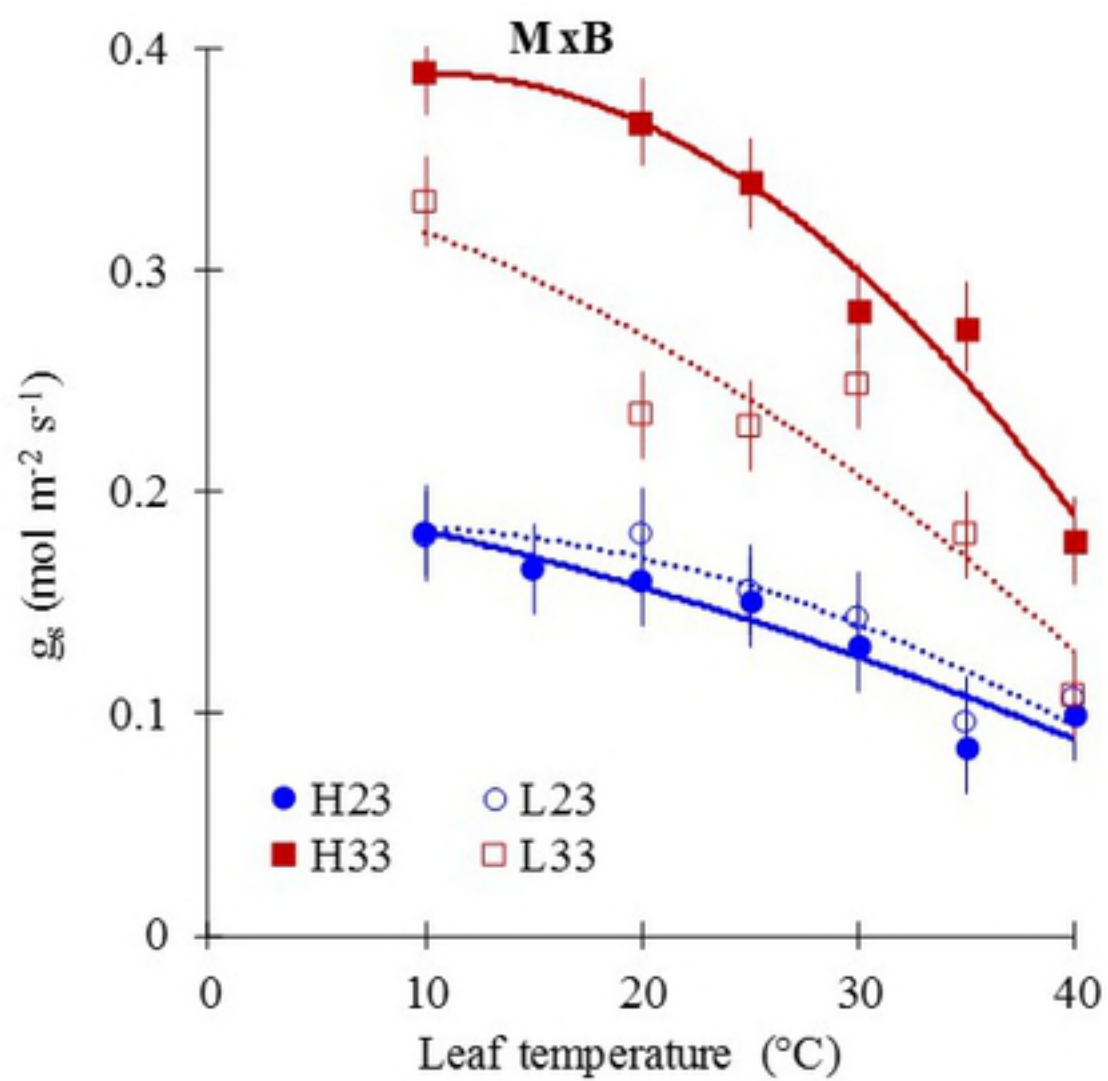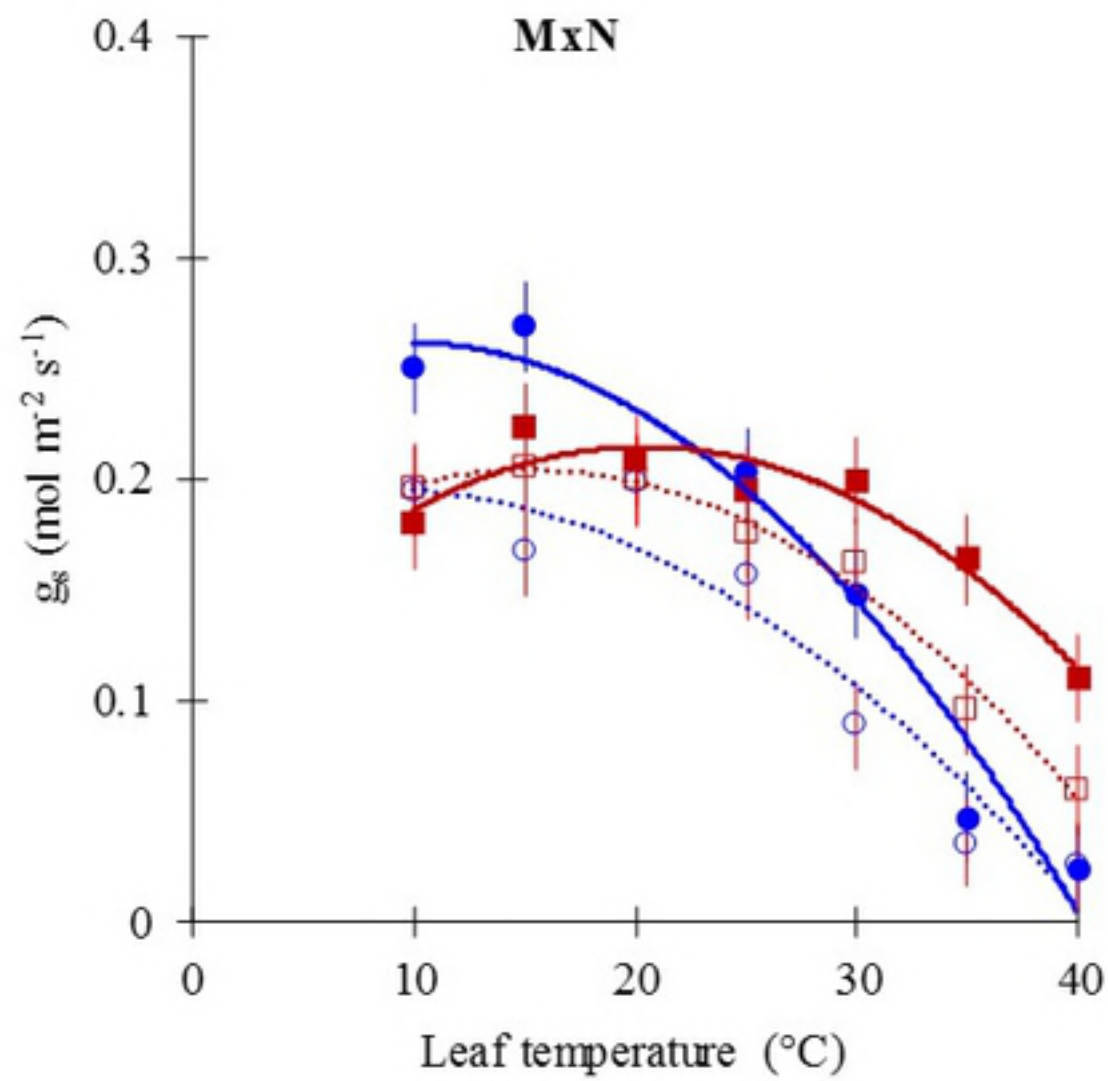

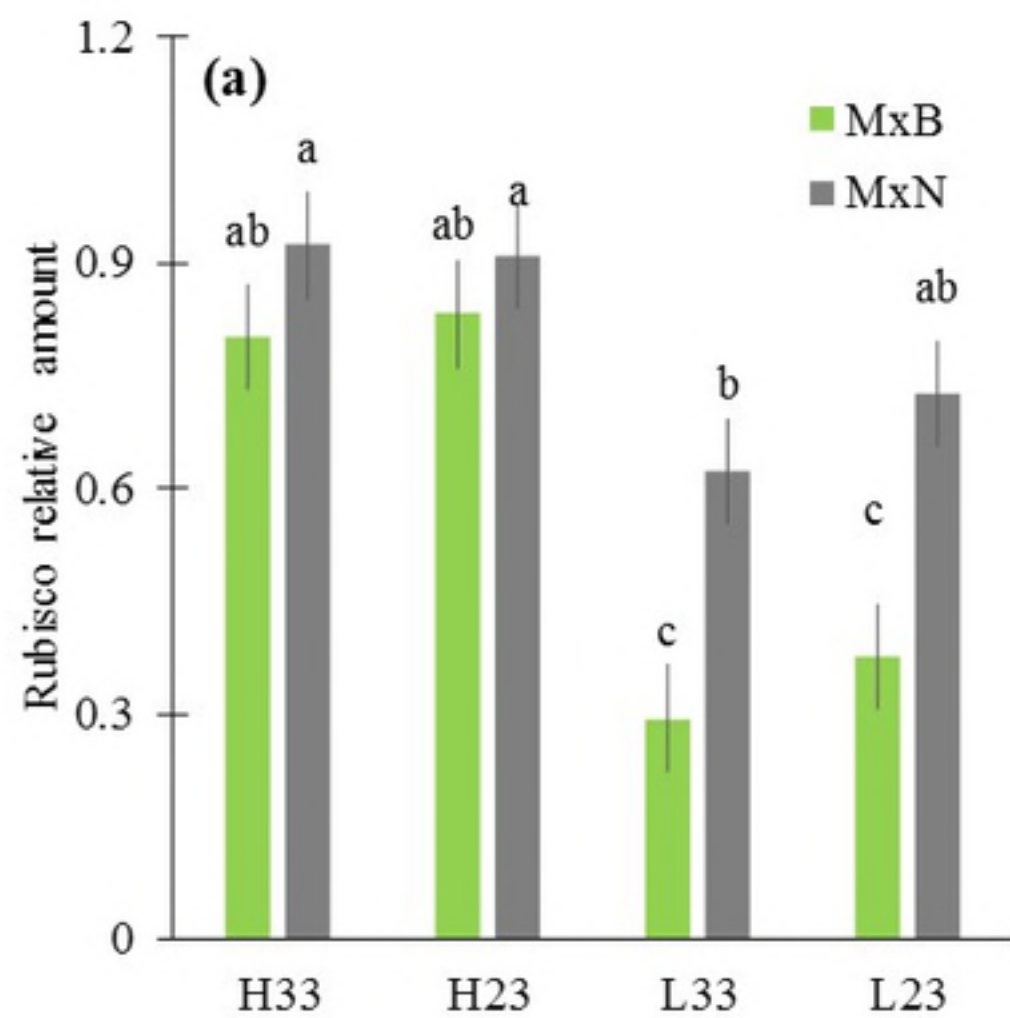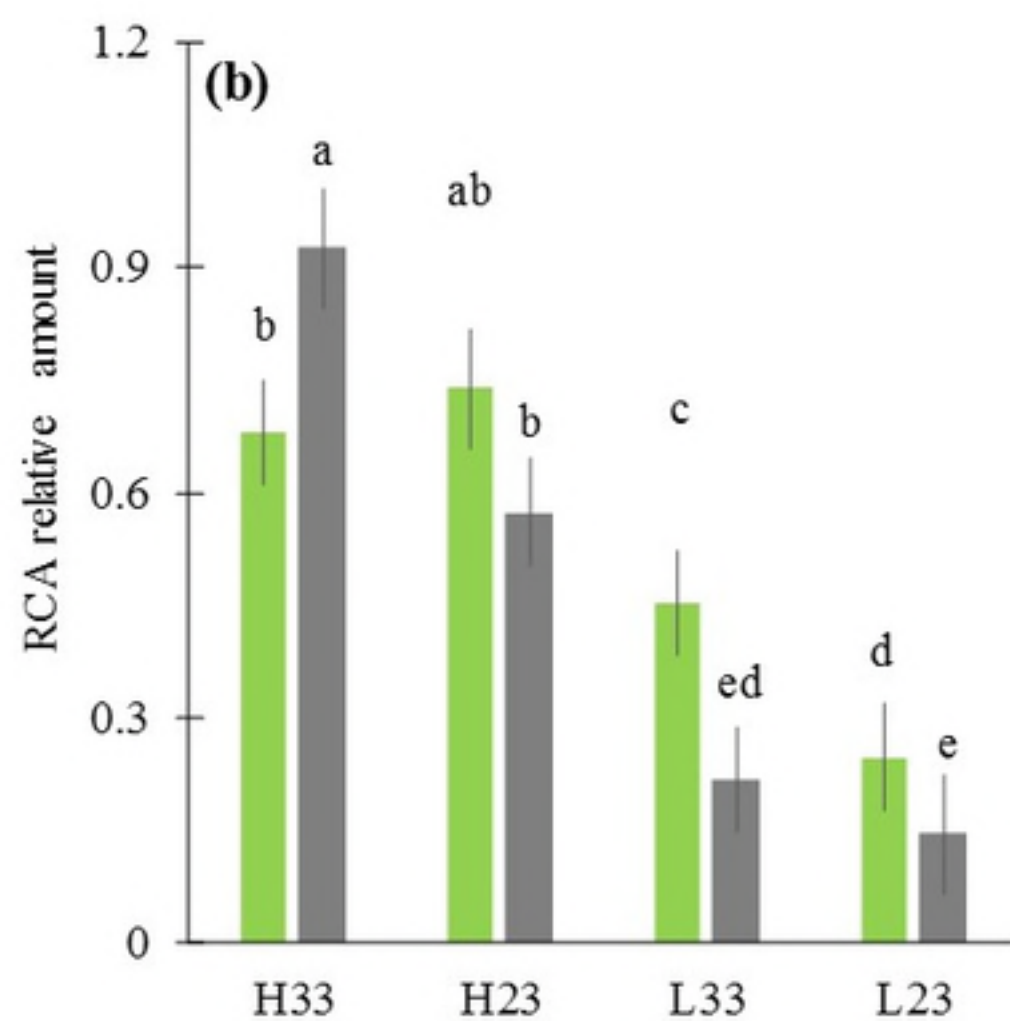

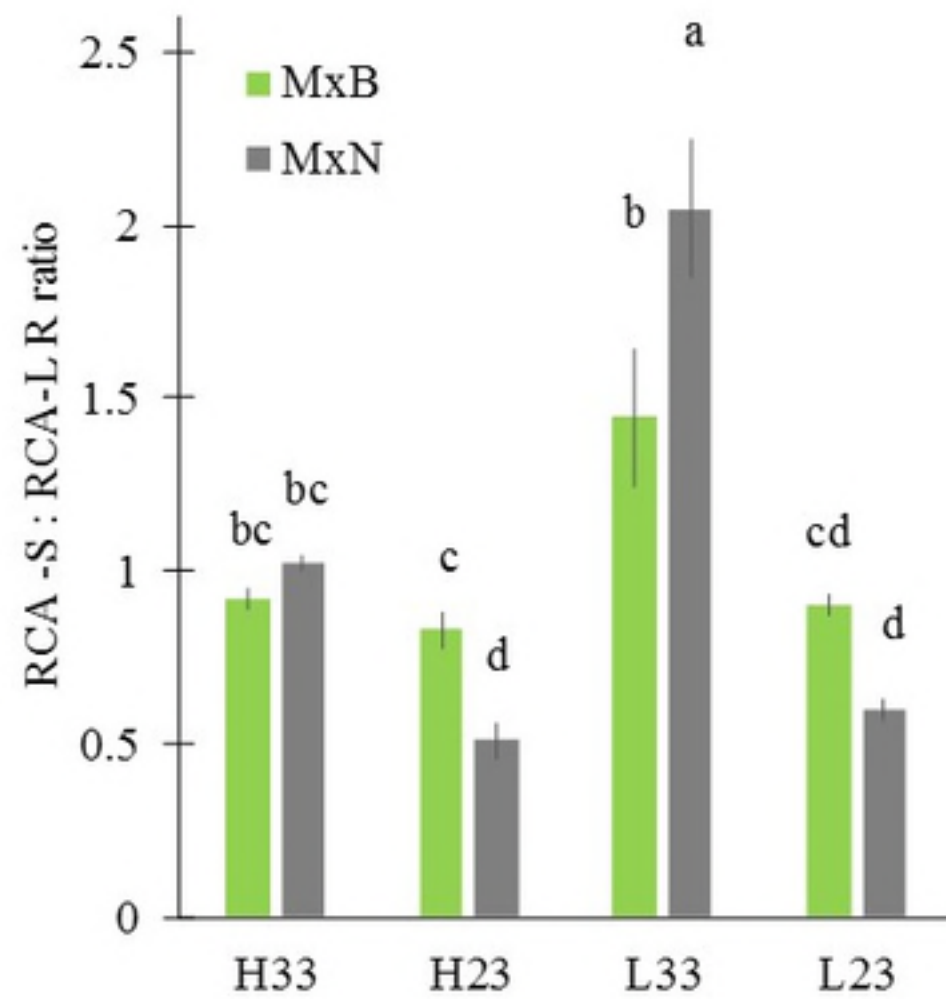

Source: http://biorxiv.org/content/10.1101/438069v1.full.pdf
